# Supplementary material
Source: PubMed Central journal article supplement (PMC4018919)
Supplement: AEM.04162-13_zam999105354so1.pdf [file AEM.04162-13_zam999105354so1.pdf]

# 1 Identification of Biomarker Genes to Predict Biodegradation of 1,4-Dioxane

2 Phillip B. Gedalanga,<sup>a</sup> Peerapong Pornwongthong,<sup>a</sup> Rebecca Mora,<sup>b</sup> Sheau-Yun Dora Chiang,<sup>c</sup>

3 Brett Baldwin,<sup>d</sup> Dora Ogles,<sup>d</sup> and Shaily Mahendra<sup>a#</sup>

4

5

## 6 SUPPORTING INFORMATION

7 The genome of *Pseudonocardia dioxanivorans* CB1190 was used to identify biomarkers  
8 targeting genes encoding monooxygenase enzymes. *In silico* analysis of the CB1190 genome  
9 revealed 2,267 monooxygenase-associated genes (Figure S1). A group of bacterial  
10 multicomponent monooxygenases consisting of the dioxane/tetrahydrofuran monooxygenase  
11 (DXMO), Phenol-2 monooxygenase (PHE), propane monooxygenase (PrMO) were identified  
12 within this set and evaluated to serve as candidate biomarkers for biodegradation of 1,4-dioxane.  
13 In addition to these gene targets, the aldehyde dehydrogenase (ALDH) associated with the  
14 dioxane/tetrahydrofuran degrading gene cluster (1) and an alcohol dehydrogenase (ADH)  
15 associated with alkane oxidation pathways (2) were also selected as a potential biomarkers  
16 because these targets may play important roles in metabolic or cometabolic dioxane  
17 biodegradation.

18

### 19 *Primer Design:*

20 Primers were designed using Primer3 Plus (3). Specificity of each target was examined using  
21 blastp and blastn against sequences deposited in NCBI Genbank protein and nucleotide databases,  
22 respectively. Phylogenetic trees were constructed to determine the specificity of primer sets to  
23 both gene function and to known dioxane-degrading bacteria. Once targeted regions were

24 screened for specificity, primer amplicons were evaluated for secondary structure using mfold  
25 (4). Primers passing all criteria were used to examine gene abundance and expression in pure  
26 cultures of CB1190 and activated sludge samples.

27

### 28 *Growth on an Alternative Monooxygenase-Inducing Substrate*

29 To determine the influence of toluene on the expression of our biomarker candidate genes,  
30 CB1190 was grown in 50 mL AMS medium supplemented with 100 mg/L toluene in triplicate  
31 sterile 250 mL boston bottles equipped with Mininert valves® at 30°C with 150 rpm agitation.  
32 0.3 mL of sample were collected over time and toluene was quantified using a gas  
33 chromatograph equipped with a flame ionization detector (GC-FID). 100 µL of headspace was  
34 collected from the bottles and injected into a Hewlett-Packard 6890 GC-FID (Hewlett-Packard,  
35 Atlanta, GA) with a Restek® Stabilwax-DB capillary column (30 m x 0.53 mm ID x 1 µm;  
36 Restek, Bellefonte, PA). The injector and detector were maintained at 220°C and 250°C,  
37 respectively. The oven was programmed to ramp from 100°C to 150°C at 25°C/min and held for  
38 1.5 min at 150°C. The retention time of toluene was 2.5min. Samples were collected during  
39 growth on toluene and RNA was isolated and qRT-PCR was performed as described in the  
40 Materials and Methods.

41

41

42 **REFERENCES**

- 43 1. **Thierner B, Andreesen JR, Schrader T.** 2003. Cloning and characterization of a  
44 gene cluster involved in tetrahydrofuran degradation in *Pseudonocardia* sp strain  
45 K1. *Arch Microbiol* **179**:266-277.
- 46 2. **Kotani T, Yamamoto T, Yurimoto H, Sakai Y, Kato N.** 2003. Propane  
47 monooxygenase and NAD(+)-dependent secondary alcohol dehydrogenase in  
48 propane metabolism by *Gordonia* sp strain TY-5. *J Bacteriol* **185**:7120-7128.
- 49 3. **Untergasser A, Nijveen H, Rao X, Bisseling T, Geurts R, Leunissen JA.** 2007.  
50 Primer3Plus, an enhanced web interface to Primer3. *Nucleic acids research*  
51 **35**:W71-74.
- 52 4. **Zuker M.** 2003. Mfold web server for nucleic acid folding and hybridization  
53 prediction. *Nucleic acids research* **31**:3406-3415.

54

55

56

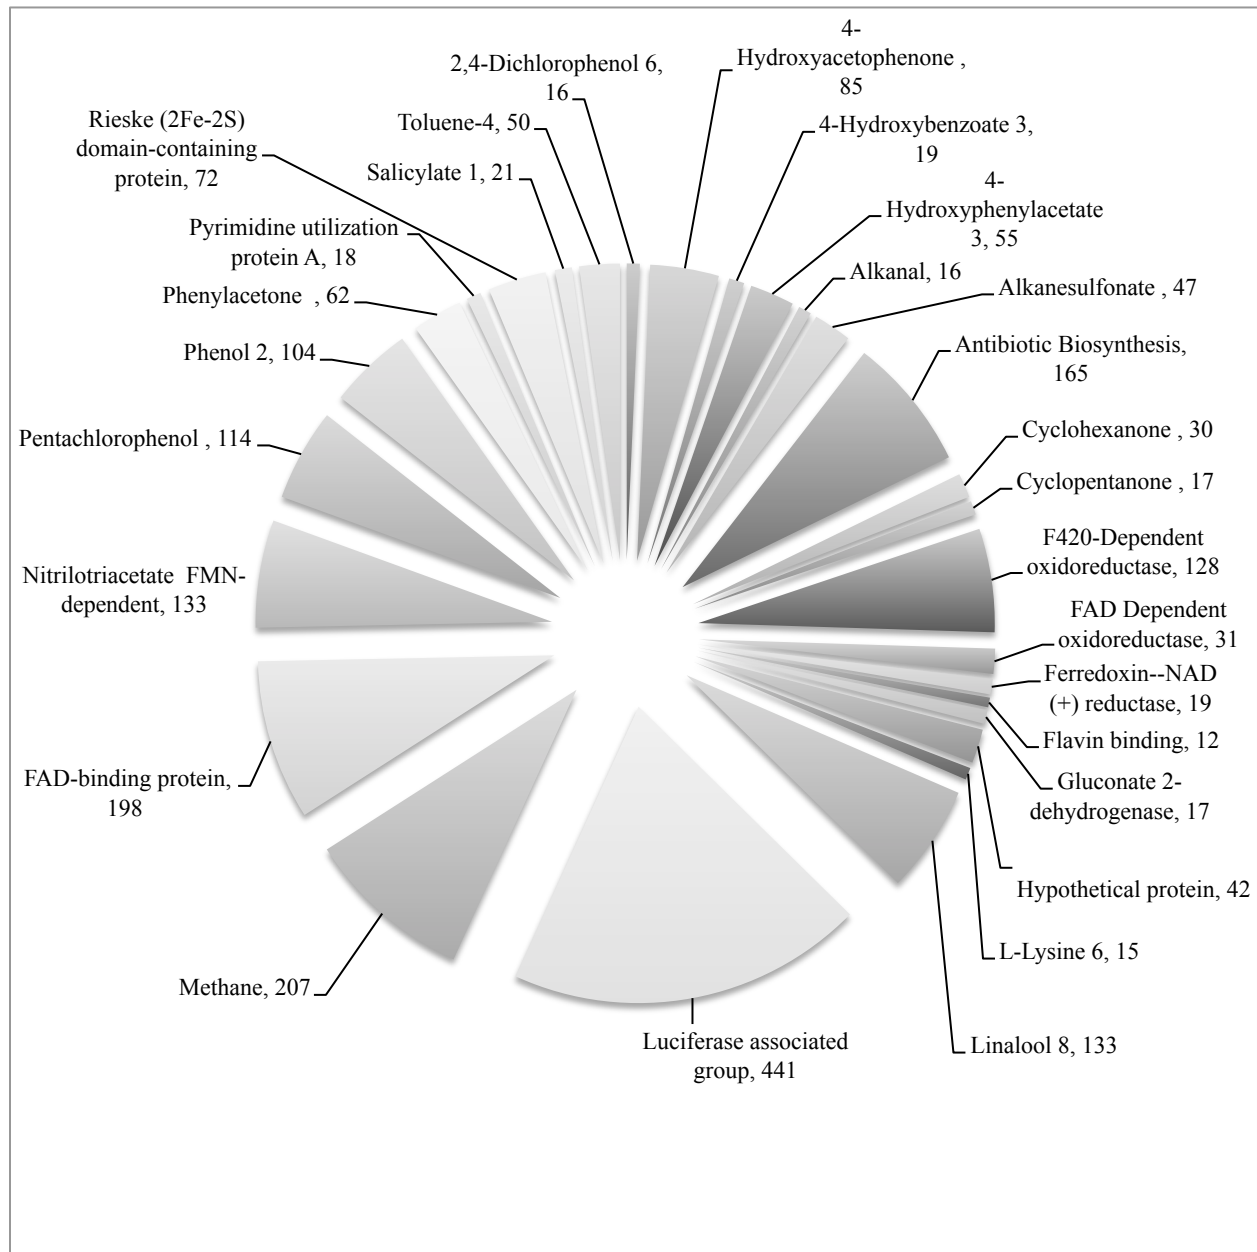

57

58 **Figure S1.** Monoxygenase associated functional groups identified within the genome of  
 59 *Pseudonocardia dioxanivorans* CB1190.

60

61

61

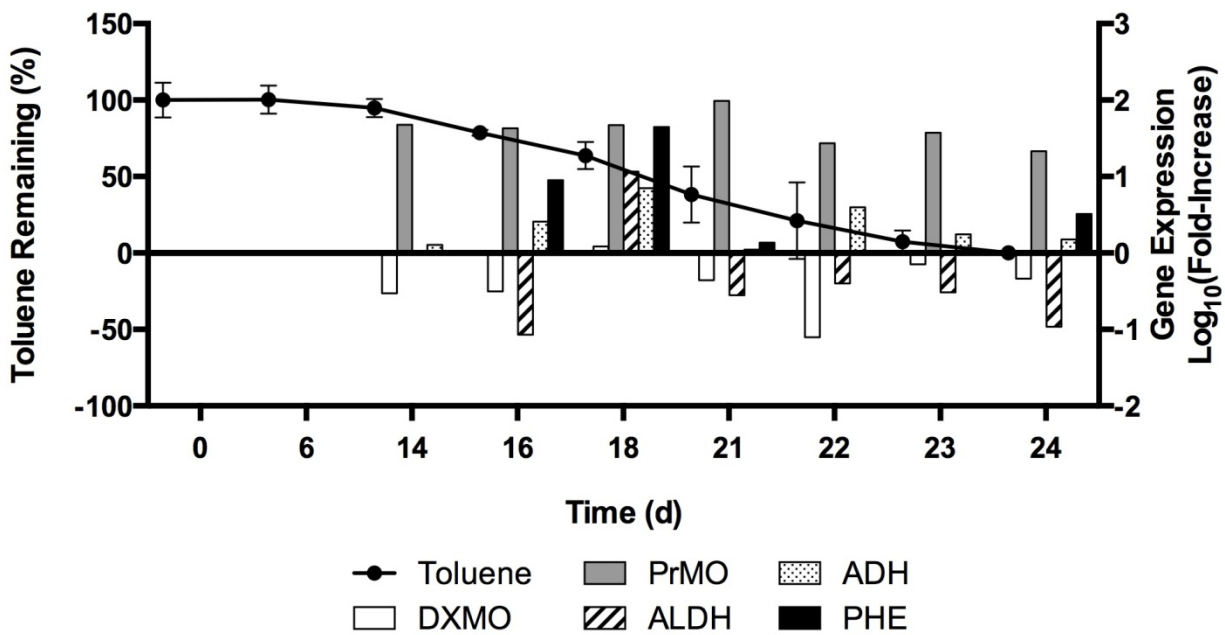

62

63 **Figure S2.** Time-dependent gene expression profile for candidate biomarkers in pure cultures of  
64 *Pseudonocardia dioxanivorans* CB1190 grown on toluene as the sole carbon and energy source.  
65 DXMO was the only target without significant expression during growth on toluene.
